# Supplementary material
Source: MDPI journal article supplement (https://www.mdpi.com/2073-445X/12/5/1094)
Supplement: s1 [file s1]

## APPENDIX 1

### Questionnaire 1: Evaluation of the monetary value of mangroves with school stakeholders

#### 1. General Information

|             | Accomplished tasks |       |      | Person in charge |
|-------------|--------------------|-------|------|------------------|
|             | Date               | Month | Year | Signature        |
| Interview   |                    |       |      |                  |
| Supervision |                    |       |      |                  |
| Control     |                    |       |      |                  |

| Features                                  | Codes                                                                                                                                                                                                                 | Write Answer |
|-------------------------------------------|-----------------------------------------------------------------------------------------------------------------------------------------------------------------------------------------------------------------------|--------------|
| 1.1 Department (DEPART)                   | 1 = Ouémé, 2 = Litoral, 3 = Atlantique, 4 = Mono                                                                                                                                                                      | /_____/      |
| 1.2 District (DIST)                       | 1 = Sèmékpodji, 2 = Aguégues, 3 = Abomey-calavi, 4 = Ouidah, 5 = Kpomassè, 6 = Comé, 7 = Bopa, 8 = Grand-popo,                                                                                                        | /_____/      |
| 1.3 Arrondissement (ARRON)                | 1 = Ekpè, 2 = Togbin, 3 = Hio, 4 = Avlekété, 5 = Djègbadji, 6 = Djondji, 7 = Houakpè Daho, 8 = Cocokodji, 9 = Akodeha, 10 = Kpétou, 11 = Possotomè, 12 = Bopa, 13 = Avlo, 14 = Agoué, 15 = Ilacondji                  | /_____/      |
| 1.4 Village (VILLAGE)                     | 1 = Tchonvi, 2 = Togléta, 3 = Hio centre, 4 = Ahouandji, 5 = Koclodji, 6 = Djondji, 7 = Djègbamin, 8 = Adounko, 9 = Ouèdèmé-Pédah, 10 = Gbété, 11 = Sèougato, 12 = Couffonou, 13 = Lanhou, 14 = Ayiginnou, 15 = Louis | /_____/      |
| 1.5 Site                                  | 1 = 1017, 2 = 1018                                                                                                                                                                                                    | /_____/      |
| 1.6 School head                           |                                                                                                                                                                                                                       |              |
| 1.7 Respondent                            |                                                                                                                                                                                                                       |              |
| 1.8 School address                        |                                                                                                                                                                                                                       |              |
| 1.9 Geographical region (GPS coordinates) |                                                                                                                                                                                                                       |              |

#### 2. Monetary value of education service (educational outing: to be administrated to schools' administration)

Here, the idea is that mangroves represent experiment grounds and we wish to estimate the amount that could be saved by the school if they had had a mangrove site by their place.

How many students did you send for outings in mangroves during the last 5 years?

|                    | 2018 | 2017 | 2016 | 2015 | 2014 |
|--------------------|------|------|------|------|------|
| Number of students |      |      |      |      |      |

What was the cost linked to their outing?

| Items               | Cost per Student |      |      |      |      |
|---------------------|------------------|------|------|------|------|
|                     | 2018             | 2017 | 2016 | 2015 | 2014 |
| Car transport       |                  |      |      |      |      |
| Motorbike transport |                  |      |      |      |      |
| Boat transport      |                  |      |      |      |      |
| Food                |                  |      |      |      |      |
| Lodging             |                  |      |      |      |      |
| Guides              |                  |      |      |      |      |
| Entry fees          |                  |      |      |      |      |
| Taxes               |                  |      |      |      |      |
| Souvenirs           |                  |      |      |      |      |

## APPENDIX 2

### Questionnaire 2: Mangroves—Vulnerability and monetary value within local communities

#### 1. General Information

|             | Accomplished tasks |       |      | Person in charge |
|-------------|--------------------|-------|------|------------------|
|             | Date               | Month | Year | Signature        |
| Interview   |                    |       |      |                  |
| Supervision |                    |       |      |                  |
| Control     |                    |       |      |                  |

| Features                                  | Codes                                                                                                                                                                                                                 | Write Answer |
|-------------------------------------------|-----------------------------------------------------------------------------------------------------------------------------------------------------------------------------------------------------------------------|--------------|
| 1.1 Department (DEPART)                   | 1 = Ouémé, 2 = Litoral, 3 = Atlantique, 4 = Mono                                                                                                                                                                      | /_____/      |
| 1.2 District (DIST)                       | 1 = Sèmekpodji, 2 = Aguégues, 3 = Abomey-calavi, 4 = Ouidah, 5 = Kpomassè, 6 = Comé, 7 = Bopa, 8 = Grand-popo,                                                                                                        | /_____/      |
| 1.3 Arrondissement (ARRON)                | 1 = Ekpè, 2 = Togbin, 3 = Hio, 4 = Avlekété, 5 = Djègbadji, 6 = Djondji, 7 = Houakpè Daho, 8 = Cocokodji, 9 = Akodeha, 10 = Kpétou, 11 = Possotomè, 12 = Bopa, 13 = Avlo, 14 = Agoué, 15 = Ilacondji                  | /_____/      |
| 1.4 Village (VILLAGE)                     | 1 = Tchonvi, 2 = Togléta, 3 = Hio centre, 4 = Ahouandji, 5 = Koclodji, 6 = Djondji, 7 = Djègbamin, 8 = Adounko, 9 = Ouèdèmé-Pédah, 10 = Gbété, 11 = Sèougato, 12 = Couffonou, 13 = Lanhou, 14 = Ayiginnou, 15 = Louis | /_____/      |
| 1.5 Site                                  | 1 = 1017, 2 = 1018                                                                                                                                                                                                    | /_____/      |
| 1.6 Household head                        |                                                                                                                                                                                                                       |              |
| 1.7 Respondent                            |                                                                                                                                                                                                                       |              |
| 1.8 Address                               |                                                                                                                                                                                                                       |              |
| 1.9 Geographical region (GPS coordinates) |                                                                                                                                                                                                                       |              |

## 2 Socio-demographic characteristics of the household members

**Note:** Household is defined as a group of people (related or not) who eat and live together in the same home for at least six months in a year. This includes employees and visitors, provided that they eat and live with one family most of the time. However, the household excludes the family members who live elsewhere most of the time for more than 6 months in a year or 4 days in a week.

| Features                                         | Codes                                                                                                                    | Write Answer |
|--------------------------------------------------|--------------------------------------------------------------------------------------------------------------------------|--------------|
| 2.1. Household head—gender                       | 1 = female, 2 = male                                                                                                     |              |
| 2.2. Household head—age                          | Write answer                                                                                                             |              |
| 2.3. Number of years of residence in the village | Write answer                                                                                                             |              |
| 2.4. Marital status of household head            | 1 = single, 2 = married, 3 = widowed, 4 = divorced, 5 = other (specify)                                                  |              |
| 2.5. Household composition                       | Male                                                                                                                     | Female       |
|                                                  |                                                                                                                          |              |
| 2.6. Ethnic group of household head              | 1 = Goun, 2 = Fon, 3 = Nago, 4 = Mina, 5 = Ewe, 6 = Pla, 7 = Pedah, 8 = Aizo, 9 = Keta, 10 = Adja, 11 = others (specify) |              |

|                                                                                                                                                 |                                                                                                                                                             |  |
|-------------------------------------------------------------------------------------------------------------------------------------------------|-------------------------------------------------------------------------------------------------------------------------------------------------------------|--|
| 2.7. Religion of household head                                                                                                                 | 1 = Christianity, 2 = Islam, 3 = endogenous religions, 4 = none, 5 = others                                                                                 |  |
| 2.8. Education level of household head                                                                                                          | 0 = no formal education, 1 = primary school, 2 = Junior High School, 3 = Senior High School, 4 = University level, 5 = Koranic, 6 = local language literacy |  |
| 2.9. Household head has fishery as main activity                                                                                                | 0 = no, 1 = yes                                                                                                                                             |  |
| 2.10. Number of years in fishery activities as household head                                                                                   |                                                                                                                                                             |  |
| 2.11. Household fishery type                                                                                                                    | 1 = commercial fishing (coastal), 2 = family fishing (lagoon), 3 = both                                                                                     |  |
| 2.12. Household head has secondary activities                                                                                                   | 0 = no, 1 = yes                                                                                                                                             |  |
| 2.13. What are the other livelihood sources                                                                                                     | 1 = farming, 2 = livestock holding, 3 = commerce, 4 = arts and crafts, 5 = administrative leader, 6 = others (specify)                                      |  |
| 2.14. What is the average cash income of the household (monthly)                                                                                |                                                                                                                                                             |  |
| 2.15. What do you spend your income on                                                                                                          |                                                                                                                                                             |  |
| 2.16. Do you or members of your household belong to any mangrove management organization                                                        | 0 = not a member, 1 = yes, a village group (GV), 2 = yes, NGO, 3 = yes, a village group and NGO, 4 = other (specify)                                        |  |
| 2.17. Do you or members of your household receive training in mangrove conservation                                                             | 0 = no, 1 = yes                                                                                                                                             |  |
| 2.18. Average number of Public Extension visits related to mangroves' importance in production purposes in each year (Forestry agencies)        |                                                                                                                                                             |  |
| 2.19. Average number of Private Extension visits related to mangroves' importance in production purposes in each year (Forestry agencies, NGOs) |                                                                                                                                                             |  |

### 3. Knowledge of ecosystem services by the household members

What are the mangrove ESs you know (0 = no, 1 = yes)? Please put a star before the ones the respondent's household benefits from. How many times did you benefit from it in the last 4 weeks (0 = no, 1 = 1, 2 = 2, 3 = 3, 4 = 4, 5 = 5, 6 = 6, 7 = 7)?

| Ecosystem Services         | Knowledge | Frequency (Weeks) |   |   |   | Quantity (Clearly Specify Units) |  |  |  |
|----------------------------|-----------|-------------------|---|---|---|----------------------------------|--|--|--|
|                            |           | 1                 | 2 | 3 | 4 |                                  |  |  |  |
| 3.1. Firewood              |           |                   |   |   |   |                                  |  |  |  |
| 3.2. Timber                |           |                   |   |   |   |                                  |  |  |  |
| 3.3. Branches for "Acadja" |           |                   |   |   |   |                                  |  |  |  |
| 3.4. Fodder                |           |                   |   |   |   |                                  |  |  |  |

|                                       |  |  |  |  |  |  |  |  |  |
|---------------------------------------|--|--|--|--|--|--|--|--|--|
| 3.5. Handicraft (dyes to colour nets) |  |  |  |  |  |  |  |  |  |
| 3.6. Fisheries                        |  |  |  |  |  |  |  |  |  |
| 3.7. Crab collection                  |  |  |  |  |  |  |  |  |  |
| 3.8. Oyster collection                |  |  |  |  |  |  |  |  |  |
| 3.9. Shrimp collection                |  |  |  |  |  |  |  |  |  |
| 3.10. Hunting (snakes, varan, etc)    |  |  |  |  |  |  |  |  |  |
| 3.11. Ecotourism                      |  |  |  |  |  |  |  |  |  |
| 3.12. Education                       |  |  |  |  |  |  |  |  |  |
| 3.13. Research                        |  |  |  |  |  |  |  |  |  |
| 3.14. Carbon sequestration            |  |  |  |  |  |  |  |  |  |
| 3.15. Air purification                |  |  |  |  |  |  |  |  |  |
| 3.16. Water purification              |  |  |  |  |  |  |  |  |  |
| 3.17. Temperature regulation          |  |  |  |  |  |  |  |  |  |
| 3.18. Waste treatment                 |  |  |  |  |  |  |  |  |  |
| 3.19. Shoreline protection (flood)    |  |  |  |  |  |  |  |  |  |
| 3.20. Pollination                     |  |  |  |  |  |  |  |  |  |
| 3.21. Apiculture                      |  |  |  |  |  |  |  |  |  |
| 3.22. Aquaculture                     |  |  |  |  |  |  |  |  |  |
| 3.23. Nursery ground for fish         |  |  |  |  |  |  |  |  |  |
| 3.24. Biodiversity host               |  |  |  |  |  |  |  |  |  |
| 3.25. Existence                       |  |  |  |  |  |  |  |  |  |
| 3.26. Bequest                         |  |  |  |  |  |  |  |  |  |

#### 4. Monetary value of indirect and non-“willingness to pay” method

Code: 0 = not accept to pay, 1 = 2500 XOF, 2 = 5000 XOF, 3 = 7500 XOF, 4 = 10,000 XOF, 5 ≥ 0,000 XOF (please specify amount)

| Ecosystem Services          | Description of the Method                                                                                            | Monetary Value |
|-----------------------------|----------------------------------------------------------------------------------------------------------------------|----------------|
| 4.1. Biodiversity host      | How much would you pay to conserve all species (animals and plants) inside the mangrove stands?                      |                |
| 4.2. Air purification       | If we were to pay for the air we breathe, how much are you ready to pay per day?                                     |                |
| 4.3. Water purification     | How much are you ready to pay to get clean (drinking water) from mangroves?                                          |                |
| 4.4. Temperature regulation | If we were to pay for the cool weather, how much are you ready to pay per day?                                       |                |
| 4.5. waste treatment        | How much are you willing to pay for residuals of chemicals used in your farms to be eliminated (per farming season)? |                |

#### 5. Monetary value of habitat service (production function method)

##### 5.1 Nursery ground for fish

| Questions                                                  | Codes           | Answers |        |        |        |        |
|------------------------------------------------------------|-----------------|---------|--------|--------|--------|--------|
|                                                            |                 | Week 1  | Week 2 | Week 3 | Week 4 | Week 5 |
| 5.1.1. Does any member of your household practice fishing? | No = 1, Yes = 2 |         |        |        |        |        |

|                                                                                   |                                                                   |  |  |  |  |  |
|-----------------------------------------------------------------------------------|-------------------------------------------------------------------|--|--|--|--|--|
| 5.1.2. If yes, how often did you practice fishing during the last 5 weeks?        | No = 0, Occasionally = 1, Monthly = 2, Weekly = 3, Daily = 4      |  |  |  |  |  |
| 5.1.3. What quantity did you collect per fishing day? (specify the quantity)      | <1 basket = 0, 1–3 baskets = 1, >3 baskets = 2                    |  |  |  |  |  |
| 5.1.4. What percentage did you sell?                                              | None = 0, <1 = 1, 1–3 = 2, >3 = 3                                 |  |  |  |  |  |
| 5.1.5. How much did you earn from selling the fish per week? (specify the amount) | Nothing = 0, <2000 = 1, 2000–5000 = 2, 5000–10000 = 3, >10000 = 4 |  |  |  |  |  |
| 5.1.6. To what extent did fishing contribute to your income?                      | None = 0, < 25% = 1, 25–50% = 2, 50–75% = 3, 75–100% = 4          |  |  |  |  |  |

Details on how you set the price of the fish

.....  
.....  
.....  
.....  
.....

## 5.2 Hunting of bush crabs

|                                                                                    | Codes                                                               | Answers |        |        |        |        |
|------------------------------------------------------------------------------------|---------------------------------------------------------------------|---------|--------|--------|--------|--------|
|                                                                                    |                                                                     | Week 1  | Week 2 | Week 3 | Week 4 | Week 5 |
| 5.2.1. Does any member of your household practice hunting of bush crabs?           | No = 1, Yes = 2                                                     |         |        |        |        |        |
| 5.2.2. If yes, how often did you practice it during the last 5 weeks?              | No = 0, Occasionally = 1, Monthly = 2, Weekly = 3, Daily = 4        |         |        |        |        |        |
| 5.2.3. What quantity did you collect per hunting day? (specify the quantity)       | <1 basket = 0, 1–3 baskets = 1, >3 baskets = 2                      |         |        |        |        |        |
| 5.2.4. What percentage did you sell?                                               | None = 0, <1 = 1, 1–3 = 2, >3 = 3                                   |         |        |        |        |        |
| 5.2.5. How much did you earn from selling the crabs per week? (specify the amount) | Nothing = 0, <2000 = 1, 2000–5000 = 2, 5000–10,000 = 3, >10,000 = 4 |         |        |        |        |        |
| 5.2.6. To what extent did hunting crabs contribute to your income?                 | None = 0, <25% = 1, 25–50% = 2, 50–75% = 3, 75–100% = 4             |         |        |        |        |        |

Details on how you set the price of the crabs

.....  
 .....  
 .....  
 .....  
 .....

### 5.3 Hunting of other mangrove-hosted animals

5.3.1. Which other mangrove-hosted animals do you or members of your household hunt?

a-..... b-

.....

c-..... d-

.....

a- First other mangrove-hosted animals hunted.....

| Questions                                                                     | Codes                                                               | Answers |        |        |        |        |
|-------------------------------------------------------------------------------|---------------------------------------------------------------------|---------|--------|--------|--------|--------|
|                                                                               |                                                                     | Week 1  | Week 2 | Week 3 | Week 4 | Week 5 |
| 5.3.2.a Does any member of your household practice hunting (specify animal)?  | No = 1, Yes = 2                                                     |         |        |        |        |        |
| 5.3.3.a If yes, how often did you practice it during the last 5 weeks?        | No = 0, Occasionally = 1, Monthly = 2, Weekly = 3, Daily = 4        |         |        |        |        |        |
| 5.3.4.a What quantity did you collect per hunting day? (specify the quantity) | <1 basket = 0, 1–3 baskets = 1, >3 baskets = 2                      |         |        |        |        |        |
| 5.3.5.a What percentage did you sell?                                         | None = 0, <1 = 1, 1–3 = 2, >3 = 3                                   |         |        |        |        |        |
| 5.3.6.a How much did you earn from selling it per week? (specify the amount)  | Nothing = 0, <2000 = 1, 2000–5000 = 2, 5000–10,000 = 3, >10,000 = 4 |         |        |        |        |        |
| 5.3.7.a To what extent did hunting of this animal contribute to your income?  | None = 0, <25% = 1, 25–50% = 2, 50–75% = 3, 75–100% = 4             |         |        |        |        |        |

b- ..Second other mangrove-hosted animals hunted .....

|                                                                               | Codes                                                               | Answers |        |        |        |        |
|-------------------------------------------------------------------------------|---------------------------------------------------------------------|---------|--------|--------|--------|--------|
|                                                                               |                                                                     | Week 1  | Week 2 | Week 3 | Week 4 | Week 5 |
| 5.3.2.b Does any member of your household practice hunting (specify animal)?  | No = 1, Yes = 2                                                     |         |        |        |        |        |
| 5.3.3.b If yes, how often did you practice it during the last 5 weeks?        | No = 0, Occasionally = 1, Monthly = 2, Weekly = 3, Daily = 4        |         |        |        |        |        |
| 5.3.4.b What quantity did you collect per hunting day? (specify the quantity) | <1 basket = 0, 1–3 baskets = 1, >3 baskets = 2                      |         |        |        |        |        |
| 5.3.5.b What percentage did you sell?                                         | None = 0, <1 = 1, 1–3 = 2, >3 = 3                                   |         |        |        |        |        |
| 5.3.6.b How much did you earn from selling it per week? (specify the amount)  | Nothing = 0, <2000 = 1, 2000–5000 = 2, 5000–10,000 = 3, >10,000 = 4 |         |        |        |        |        |
| 5.3.7.b To what extent did hunting of this animal contribute to your income?  | None = 0, < 25% = 1, 25–50% = 2, 50–75% = 3, 75–100% = 4            |         |        |        |        |        |

## 6. Monetary value of worship service

6.1. Do you or any member of your household use mangroves as a worship place?

(no = 0; yes = 1) / \_\_\_\_\_/

6.2. If yes, would you be willing to pay for an institution to conserve mangrove forest you use for worship? (no = 0; yes = 1) / \_\_\_\_\_/

6.3. If yes, then how much?

1 = 2500 XOF, 2 = 5000 XOF, 3 = 7500 XOF, 4 = 10,000, XOF 5 ≥ 10,000 XOF (please specify amount) / \_\_\_\_\_/

## 7. Monetary value of bequest service

7.1 Would you be willing to pay money for institutions to conserve mangrove forests for future generation needs? (no = 0; yes = 1) / \_\_\_\_\_/

7.2 If yes, then how much?

1 = 2500 XOF, 2 = 5000 XOF, 3 = 7500 XOF, 4 = 10,000, XOF 5 ≥ 10,000 XOF (please specify amount) / \_\_\_\_\_/

7.3 If no, why?

.....  
.....  
.....

## 8. Monetary value of existence service

8.1. Imagine there was no mangrove forest in your village. Would you be willing to pay to have it? (no = 0; yes = 1) / \_\_\_\_\_/

8.2. If yes, then how much?

1 = 2500 XOF, 2 = 5000 XOF, 3 = 7500 XOF, 4 = 10,000 XOF, 5 ≥ 10,000 XOF (please specify amount) / \_\_\_\_\_/

8.3. If no, why?

.....  
.....  
.....

## 9. Vulnerability-Livelihood

| Questions                                                                                      | Codes                                                                              | Answers |
|------------------------------------------------------------------------------------------------|------------------------------------------------------------------------------------|---------|
| 9.1 What are the main sources of livelihood you have?                                          | 1 = Livestock, 2 = Farming, 3 = Fishing, 4 = NTFPs, 5 = Trade, 6 = Other (specify) |         |
| 9.2 What is the contribution of mangrove resources to your livelihood income?                  | None = 0, <25% = 1, 25–50% = 2, 50–75% = 3, 75–100% = 4                            |         |
| 9.3 How far is your farm to the mangrove?                                                      | 1 = Very far, 2 = Far, 3 = Very far, 4 = Other                                     |         |
| 9.4 Do you collect fodder from the mangroves for your animals? if yes, what quantity per week? | Yes = 1, No = 0                                                                    |         |
| 9.5 Do you water your crops?                                                                   | Yes = 1, No = 0                                                                    |         |
| 9.6 Do your animals go into the mangrove?                                                      | Yes = 1, No = 0                                                                    |         |
| 9.7 Do you have a fish pond?                                                                   | Yes = 1, No = 0                                                                    |         |



|                                                                         |                              |  |
|-------------------------------------------------------------------------|------------------------------|--|
| 9.8 If yes, what is the total area of occupation?                       | Write answer                 |  |
| 9.9 How far is it from the mangrove?                                    | Write answer                 |  |
| 9.10 Is it directly connected to the lagoon/lake hosting the mangroves? | Yes = 1, No = 0              |  |
| 9.11 Is it upstream or downstream?                                      | Upstream = 1, downstream = 0 |  |
| 9.12 Do you have a private mangrove land?                               | Yes = 1, No = 0              |  |
| 9.13 If yes, what is the total area of occupation?                      | Write answer                 |  |

### 10. Awareness/adaptation to climate change

| Questions                                                                                     | Codes                                                                                                                                                                                                                                                                  | Answers |
|-----------------------------------------------------------------------------------------------|------------------------------------------------------------------------------------------------------------------------------------------------------------------------------------------------------------------------------------------------------------------------|---------|
| 10.1. What is climate change?                                                                 | 1 = has never heard of it, 2 = has heard of but has limited understanding, 3 = understands and feels the effects, 4 = understands and knows the causes and the effects                                                                                                 |         |
| 10.2. What is currently causing climate change?                                               | 1 = not sure, 2 = natural, 3 = human, 4 = natural and human                                                                                                                                                                                                            |         |
| 10.3. Have you felt the effects of climate change?                                            | 1 = no/not sure, 2 = maybe (examples of extreme hazards), 3 = yes (examples of long-term climate trends), 4 = yes (examples of -erm climate trends and how they affect mangroves) 5 = example of changes in season length, beginning and end, 6 = dry spell 7 = others |         |
| 10.4. If yes, have the effects influenced mangroves?                                          | 1 = yes, 0 = no                                                                                                                                                                                                                                                        |         |
| 10.5. If yes, what have you done to help mangroves cope with the changes                      | 0 = nothing, 1 = all concise answers (write down the answer)                                                                                                                                                                                                           |         |
| 10.6. How often do you receive information on how to help mangroves adapt to climate change?  | 0 = never, 1 = once, 2 = sometimes (intermittently), 3 = often (more than once a year)                                                                                                                                                                                 |         |
| 10.7. What are the sources of your information?                                               | 0 = no source, 1 = radio/TV, 2 = social media, 3 = sensitization, 4 = training, 5 = NGO, 6 = others                                                                                                                                                                    |         |
| 10.8. How often do you talk about the effects of climate change on mangroves with your peers? | 0 = never, 1 = once, 2 = sometimes (intermittently), 3 = often (more than once a year)                                                                                                                                                                                 |         |

### 11. Community management

| Questions                                            | Codes           | Answers |
|------------------------------------------------------|-----------------|---------|
| 11.1. How many management groups/committees exist?   | Write number    |         |
| 11.2. How many committees do you belong to?          | Write number    |         |
| 11.3. Do the groups control access to the mangroves? | 0 = no, 1 = yes |         |

|                                                                     |                                                                                                                    |  |
|---------------------------------------------------------------------|--------------------------------------------------------------------------------------------------------------------|--|
| 11.4. Is there a period of zero exploitation of mangrove resources? | 0 = no, 1 = yes                                                                                                    |  |
| 11.5. If yes, which period?                                         | Write down the answer                                                                                              |  |
| 11.6. Is there any rule to respect while exploiting mangroves?      | 0 = no, 1 = yes                                                                                                    |  |
| 11.7. If yes, what are the rules?                                   | Write down the answer                                                                                              |  |
| 11.8. Where are mangrove products sold?                             | 0 = no market, 1 = village market, 2 = district village, 3 = national market, 4 = international market, 5 = others |  |
| 11.9. Is there a market connection system?                          | 0 = no, 1 = yes                                                                                                    |  |

**ANY OTHER REMARKS/ CONCERNS**

.....

.....

.....

**APPENDIX 3**

**Questionnaire 3: Evaluation of the monetary value of mangroves—  
Market part**

**1. General information**

|             | Accomplished tasks |       |      | Person in charge |
|-------------|--------------------|-------|------|------------------|
|             | Date               | Month | Year | Signature        |
| Interview   |                    |       |      |                  |
| Supervision |                    |       |      |                  |
| Control     |                    |       |      |                  |

| <b>Features</b>                            | <b>Codes</b>                                                                                                                                                                                                          | <b>Write Answer</b> |
|--------------------------------------------|-----------------------------------------------------------------------------------------------------------------------------------------------------------------------------------------------------------------------|---------------------|
| 1.1 Department (DEPART)                    | 1 = Ouémé, 2 = Litoral, 3 = Atlantique, 4 = Mono                                                                                                                                                                      | /_____/             |
| 1.2 District (DIST)                        | 1 = Sèmekpodji, 2 = Aguégues, 3 = Abomey-calavi, 4 = Ouidah, 5 = Kpomassè, 6 = Comé, 7 = Bopa, 8 = Grand-popo,                                                                                                        | /_____/             |
| 1.3 Arrondissement (ARRON)                 | 1 = Ekpè, 2 = Togbin, 3 = Hio, 4 = Avlekété, 5 = Djègbadji, 6 = Djondji, 7 = Houakpè Daho, 8 = Cocokodji, 9 = Akodeha, 10 = Kpétou, 11 = Possotomè, 12 = Bopa, 13 = Avlo, 14 = Agoué, 15 = Ilacondji                  | /_____/             |
| 1.4 Village (VILLAGE)                      | 1 = Tchonvi, 2 = Togléta, 3 = Hio centre, 4 = Ahouandji, 5 = Koclodji, 6 = Djondji, 7 = Djègbamin, 8 = Adounko, 9 = Ouèdèmé-Pédah, 10 = Gbété, 11 = Sèougato, 12 = Couffonou, 13 = Lanhou, 14 = Ayiginnou, 15 = Louis | /_____/             |
| 1.5 Market name                            |                                                                                                                                                                                                                       |                     |
| 1.6 Site                                   | 1 = 1017, 2 = 1018                                                                                                                                                                                                    | /_____/             |
| 1.7 Household head                         |                                                                                                                                                                                                                       |                     |
| 1.8 Respondent                             |                                                                                                                                                                                                                       |                     |
| 1.9 Address                                |                                                                                                                                                                                                                       |                     |
| 1.10 Geographical region (GPS coordinates) |                                                                                                                                                                                                                       |                     |

**2. Monetary value of services sold/bought in markets (market price method: may be administrated in markets)**

*All prices will be in XOF (local currency)*

| <b>Ecosystem Services</b>                | <b>Name of the Market</b> | <b>Price of the Good Derived from the Service</b> | <b>Units Sold (Specify the Selling Technique)</b> |
|------------------------------------------|---------------------------|---------------------------------------------------|---------------------------------------------------|
| Firewood                                 |                           |                                                   |                                                   |
| Timber                                   |                           |                                                   |                                                   |
| Branches for "Acadja"                    |                           |                                                   |                                                   |
| Fodder                                   |                           |                                                   |                                                   |
| Dyes to colour nets: price of substitute |                           |                                                   |                                                   |
| Fisheries                                |                           |                                                   |                                                   |
| Crab collection                          |                           |                                                   |                                                   |
| Oyster collection                        |                           |                                                   |                                                   |
| Shrimp collection                        |                           |                                                   |                                                   |
| Hunting (snakes, varan, etc)             |                           |                                                   |                                                   |
| Apiculture                               |                           |                                                   |                                                   |
| Aquaculture                              |                           |                                                   |                                                   |
| Nursery ground for fish                  |                           |                                                   |                                                   |

## APPENDIX 4

### Questionnaire 4: Evaluation of the monetary value of mangroves with Research Institutions

#### 1. General information

|             | Accomplished tasks |       |      | Person in charge |
|-------------|--------------------|-------|------|------------------|
|             | Date               | Month | Year | Signature        |
| Interview   |                    |       |      | :                |
| Supervision |                    |       |      |                  |
| Control     |                    |       |      |                  |

| Features                                                 | Codes                                                                                                                                                                                                                 | Write answer |
|----------------------------------------------------------|-----------------------------------------------------------------------------------------------------------------------------------------------------------------------------------------------------------------------|--------------|
| 1.1 Department (DEPART) of, intervention                 | 1 = Ouémé, 2 = Littoral, 3 = Atlantique, 4 = Mono                                                                                                                                                                     | /_____/      |
| 1.2 District (DIST) of intervention                      | 1 = Sèmékpodji, 2 = Aguégues, 3 = Abomey-calavi, 4 = Ouidah, 5 = Kpomassè, 6 = Comé, 7 = Bopa, 8 = Grand-popo,                                                                                                        | /_____/      |
| 1.3 Sub-districts (ARRON) covered                        | 1 = Ekpè, 2 = Togbin, 3 = Hio, 4 = Avlekété, 5 = Djègbadji, 6 = Djondji, 7 = Houakpè Daho, 8 = Cocokodji, 9 = Akodeha, 10 = Kpétou, 11 = Possotomè, 12 = Bopa, 13 = Avlo, 14 = Agoué, 15 = Ilacondji                  | /_____/      |
| 1.4 Villages (VILLAGE) of, intervention                  | 1 = Tchonvi, 2 = Togléta, 3 = Hio centre, 4 = Ahouandji, 5 = Koclodji, 6 = Djondji, 7 = Djègbamin, 8 = Adounko, 9 = Ouèdémé-Pédah, 10 = Gbété, 11 = Sèougato, 12 = Couffonou, 13 = Lanhou, 14 = Ayiginnou, 15 = Louis | /_____/      |
| 1.5 Sites of intervention                                | 1 = 1017, 2 = 1018                                                                                                                                                                                                    | /_____/      |
| 1.6 Organisation                                         |                                                                                                                                                                                                                       |              |
| 1.7 Respondent                                           |                                                                                                                                                                                                                       |              |
| 1.8 Address                                              |                                                                                                                                                                                                                       |              |
| 1.9 Geographical region (GPS coordinates) of main agency |                                                                                                                                                                                                                       |              |

#### 2. Monetary value of research service (strictly for research institutions)

2.1. What budget have you dedicated to mangrove-related studies for the past 5 years?

2.2. What budget did you receive as funding for mangrove-related studies during the past 5 years?

| Years | 2.1. Budget Dedicated | 2.2. Budget Received |
|-------|-----------------------|----------------------|
| 2018  |                       |                      |
| 2017  |                       |                      |
| 2016  |                       |                      |

|      |  |  |
|------|--|--|
| 2015 |  |  |
| 2014 |  |  |

## APPENDIX 5

### Questionnaire 5: Evaluation of the monetary value of mangroves—tourism

#### 1. General information

|             | Accomplished tasks |       |      | Person in charge |
|-------------|--------------------|-------|------|------------------|
|             | Date               | Month | Year | Signature        |
| Interview   |                    |       |      |                  |
| Supervision |                    |       |      |                  |
| Control     |                    |       |      |                  |

| Features                                                 | Codes                                                                                                                                                                                                                 | Write Answer |
|----------------------------------------------------------|-----------------------------------------------------------------------------------------------------------------------------------------------------------------------------------------------------------------------|--------------|
| 1.1 Department (DEPART) of, intervention                 | 1 = Ouémé, 2 = Litoral, 3 = Atlantique, 4 = Mono                                                                                                                                                                      | /_____/      |
| 1.2 District (DIST) of intervention                      | 1 = Sèmékpodji, 2 = Aguégues, 3 = Abomey-calavi, 4 = Ouidah, 5 = Kpomassè, 6 = Comé, 7 = Bopa, 8 = Grand-popo,                                                                                                        | /_____/      |
| 1.3 Sub-districts (ARRON) covered                        | 1 = Ekpè, 2 = Togbin, 3 = Hio, 4 = Avlekété, 5 = Djègbadji, 6 = Djondji, 7 = Houakpè Daho, 8 = Cocokodji, 9 = Akodeha, 10 = Kpétou, 11 = Possotomè, 12 = Bopa, 13 = Avlo, 14 = Agoué, 15 = Ilacondji                  | /_____/      |
| 1.4 Villages (VILLAGE) of, intervention                  | 1 = Tchonvi, 2 = Togléta, 3 = Hio centre, 4 = Ahouandji, 5 = Koclodji, 6 = Djondji, 7 = Djègbamin, 8 = Adounko, 9 = Ouèdèmé-Pédah, 10 = Gbété, 11 = Sèougato, 12 = Couffonou, 13 = Lanhou, 14 = Ayiginnou, 15 = Louis | /_____/      |
| 1.5 Sites of intervention                                | 1 = 1017, 2 = 1018                                                                                                                                                                                                    | /_____/      |
| 1.6 Organisation and head                                |                                                                                                                                                                                                                       |              |
| 1.7 Respondent                                           |                                                                                                                                                                                                                       |              |
| 1.8 Address                                              |                                                                                                                                                                                                                       |              |
| 1.9 Geographical region (GPS coordinates) of main agency |                                                                                                                                                                                                                       |              |

#### 2. Socio-demographic characteristics of the tourism agency

*Note: Household is defined as a group of people (related or not) who eat and live together in the same home for at least six months in a year. This includes employees and visitors, provided that they eat and live with one family most of the time. However, the household excludes the family*

*members who live elsewhere most of the time, either for more than 6 months in a year or 4 days in a week.*

| <b>Features</b>                                                                                                                         | <b>Codes</b>                                                                                                                                                | <b>Write Answer</b> |
|-----------------------------------------------------------------------------------------------------------------------------------------|-------------------------------------------------------------------------------------------------------------------------------------------------------------|---------------------|
| 2.1. Household head—gender                                                                                                              | 1 = female, 2 = male                                                                                                                                        |                     |
| 2.2. Household head—age                                                                                                                 | Write answer                                                                                                                                                |                     |
| 2.3. Number of years in tourism activities                                                                                              | Write answer                                                                                                                                                |                     |
| 2.4. National status of organization                                                                                                    | 1 = public, 2 = private local, 3 = private national, 4 = private international, 5 = other (specify)                                                         |                     |
| 2.5. Employees                                                                                                                          | Male                                                                                                                                                        | Female              |
|                                                                                                                                         |                                                                                                                                                             |                     |
| 2.8. Education level of household head                                                                                                  | 0 = no formal education, 1 = primary school, 2 = Junior High School, 3 = Senior High School, 4 = University level, 5 = Koranic, 6 = local language literacy |                     |
| 2.11. Household fishery type                                                                                                            | 1 = commercial fishing (coastal), 2 = family fishing (lagoon), 3 = both                                                                                     |                     |
| 2.12. Household head has secondary activities                                                                                           | 0 = no, 1 = yes                                                                                                                                             |                     |
| 2.19. Average number of Extension visits related to mangroves' importance in production purposes in each year (Forestry agencies, NGOs) |                                                                                                                                                             |                     |

### **3. Monetary value of tourism and recreation services (strictly for tourism agencies)**

3.1. How many tourists did you register in reach of the last 5 years?

|                    | <b>2018</b> | <b>2017</b> | <b>2016</b> | <b>2015</b> | <b>2014</b> |
|--------------------|-------------|-------------|-------------|-------------|-------------|
| Number of tourists |             |             |             |             |             |

3.2. What is the cost linked to their visit?

| <b>Items</b>        | <b>Cost per Visitor</b> |             |             |             |             |
|---------------------|-------------------------|-------------|-------------|-------------|-------------|
|                     | <b>2018</b>             | <b>2017</b> | <b>2016</b> | <b>2015</b> | <b>2014</b> |
| Car transport       |                         |             |             |             |             |
| Motorbike transport |                         |             |             |             |             |
| Boat transport      |                         |             |             |             |             |
| Food                |                         |             |             |             |             |
| Lodging             |                         |             |             |             |             |
| Guides              |                         |             |             |             |             |
| Entry fees          |                         |             |             |             |             |
| Taxes               |                         |             |             |             |             |
| Souvenirs           |                         |             |             |             |             |

## APPENDIX 6

**Questionnaire 6: Monetary value of natural services that could be obtained artificially (Metaregression method: replacement cost method: secondary data from case studies and internet)**

*All prices will be in XOF (local currency)*

| <b>Ecosystem Services</b>      | <b>Description of the Method</b>                                                                                                                                       | <b>Monetary Value</b> |
|--------------------------------|------------------------------------------------------------------------------------------------------------------------------------------------------------------------|-----------------------|
| Air purification               | Costs that could be used to pay for other purification technique                                                                                                       |                       |
| Water purification             | Costs that could be used to pay for other purification technique                                                                                                       |                       |
| Temperature regulation         | Cost of other micro-climate cooling system                                                                                                                             |                       |
| Waste treatment                | Costs that could be used to pay for other water-cleaning technique                                                                                                     |                       |
| Shoreline protection 1         | How much money did you use to build your compound                                                                                                                      |                       |
| Shoreline protection (flood) 2 | Costs that are avoided through their existence: e.g., wall construction costs and repairing damage that floods could cause to households if mangroves were not present |                       |
| Pollination                    | Costs that could be used to complete an artificial pollination                                                                                                         |                       |
